# Supplementary material for: Self-assembling solid cathode enables high-capacity, low-cost Ca-Sb battery
Source: Research Square preprint supplement (doi:10.21203/rs.3.rs-4356928/v1), 2024-05-30
Supplement: Supplementary file 1 [file c5759b7055065d88ef0ca0eb.docx]

**Supplementary Information**

Sanghyeok Im1, Peyman Asghari-Rad1, Kelly Elizabeth Varnell1, Alex T. Vai2, Jianyi Cui2, Rachael Howland2, David Bradwell2, Hojong Kim1*

1Materials Science and Engineering, The Pennsylvania State University, 419 Steidle Building, University Park, PA 16802, United States

2Ambri Incorporated, Marlborough, MA 01752, United States


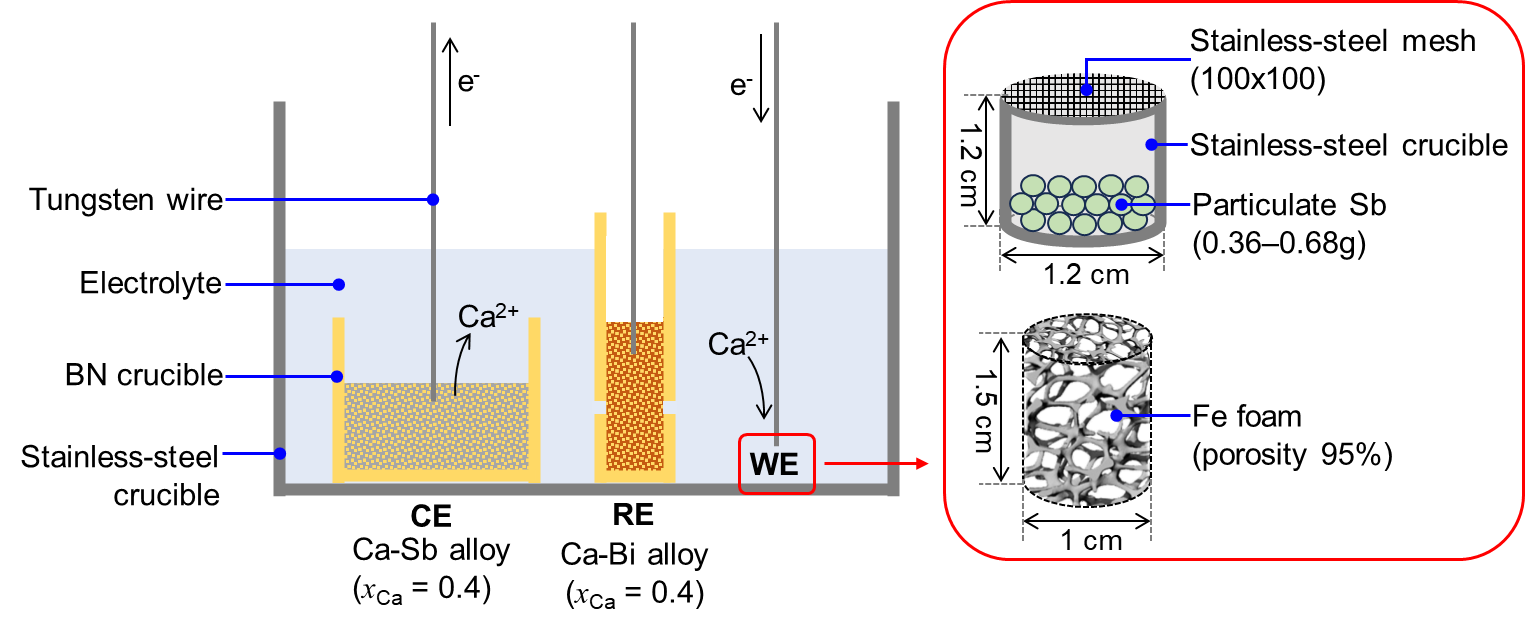


**Figure S1**. A 3-electrode cell configuration consisting of a Ca-Sb alloy (xCa = 0.40) as the counter electrode (CE) and a Ca-Bi alloy (xCa = 0.40) as the reference electrode (RE) to measure electrochemical performance of working electrode (WE) materials in a eutectic CaCl2-LiCl electrolyte at 520 °C.


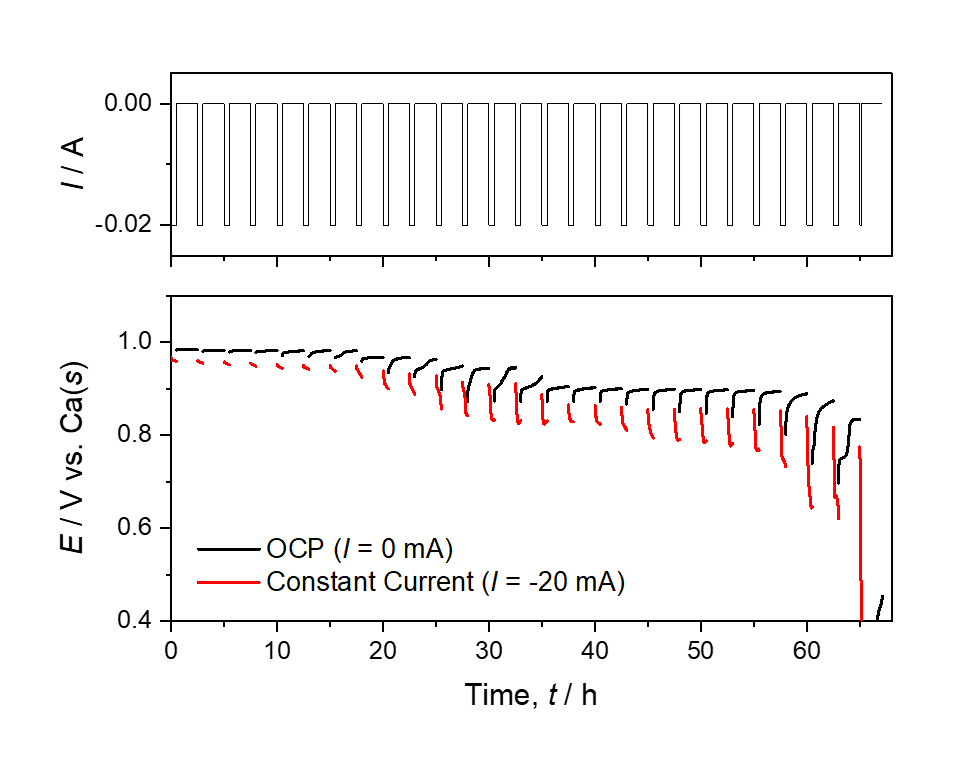


**Figure S2**. Sequential coulometric titration of an Sb electrode subjected to -20 mA for 0.5 h, after which OCP was monitored for 2 h to determine the equilibrium potential (Eeq) as a function of discharge capacity, as reported in **Figure 1d**.


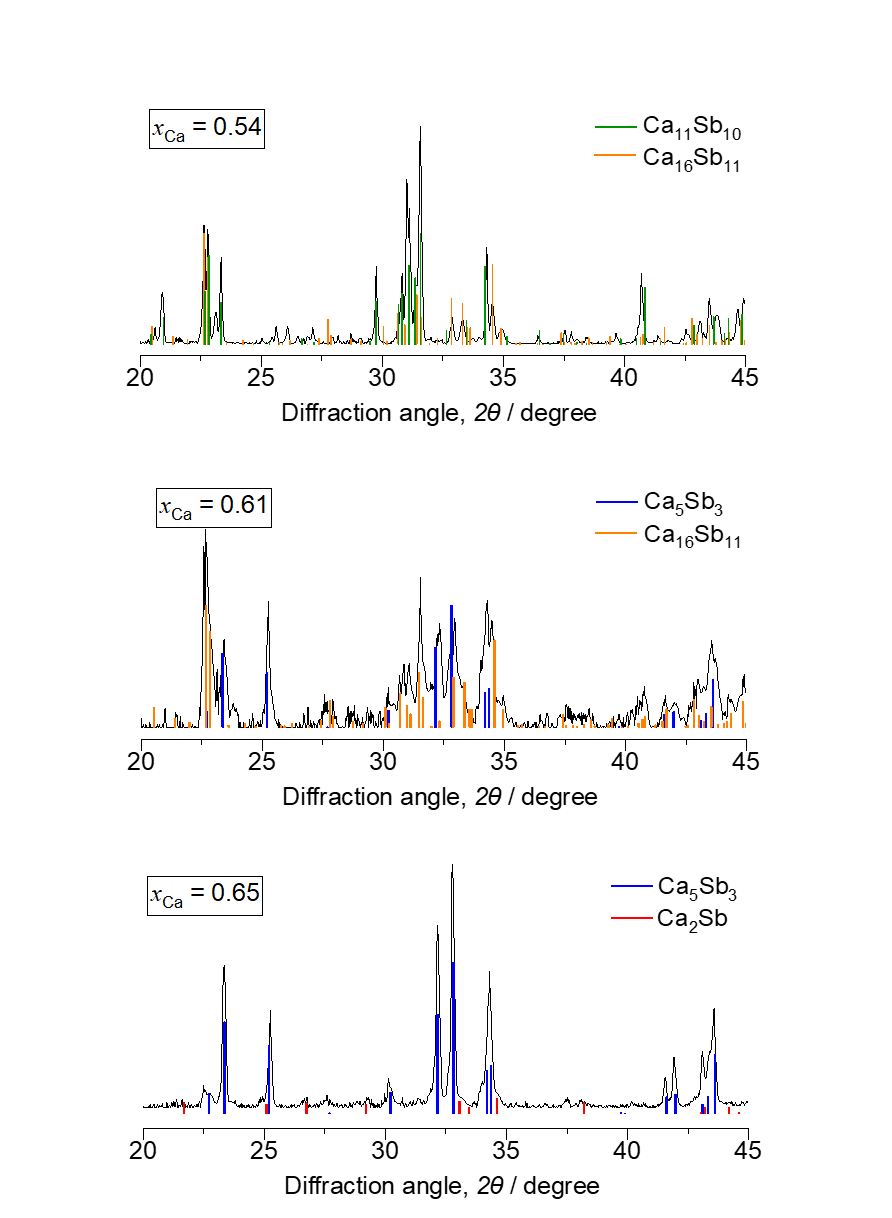


**Figure S3.** XRD patterns of Ca-Sb alloys (xCa = 0.54–0.65) used for emf measurements in **Figure 1e**, confirming the equilibrium phases present.

**Table S1.** Description of each electrode fabricated for 3-electrode cell testing and its role, composition, dimensions, and related figures in the main text (**Figure S1**).

| Electrode Composition | | | Electrode Holder | | Corresponding Figure(s) |
| --- | --- | --- | --- | --- | --- |
| Type | Material | Mass | Material | Dimension |
| RE | Ca-Bi alloy  (*x*Ca = 0.4) | 2.0 g | BN | 8 mm ID, 12 mm OD, 25 mm Height  (two capillary holes) | **Figure 1,2,4** |
| CE | Ca-Sb alloy  (*x*Ca = 0.4) | 15.0 g | BN | 21 mm ID, 25 mm OD, 12 mm Height |
| WE | Monolithic Sb | 1.0 g | BN | 8 mm ID, 12 mm OD, 12 mm Height | **Figure 1a–b** |
|  | Particulate Sb | 0.36 g | SS | 8 mm ID, 12 mm OD, 12 mm Height  (SS mesh cover) | **Figure 1d** |
|  | Ca-Sb alloys  (*x*Ca=0.54–65) | 2.0 g | BN | 8 mm ID, 12 mm OD, 25 mm Height  (with capillary holes) | **Figure 1e** |
|  | Particulate Sb | 0.68 g | SS | 8 mm ID, 12 mm OD, 12 mm Height  (SS mesh cover) | **Figure 2a** |
|  | Particulate Sb | 0.41 g | SS | 8 mm/12 mm, 12 mm  (SS mesh cover) | **Figure 2b** |
|  | Ca-Li  (Deposited in-situ) | - | Fe foam | 10 mm D, 15 mm Height  (95% porosity) | **Figure 4d** |

**Table S2**. Cell component and the dimensions of electrode holder for the Ca||Sb(s) battery and its components.

| Component | |  | Cell #1 (**Figure 3**) | Cell #2 (**Figure 5**) |
| --- | --- | --- | --- | --- |
| Cathode | | Mass | 0.70 g Sb | 7.0 g Sb |
| Current collector | 300-series SS mesh  (mesh size: 40×40) | 300-series SS mesh  (mesh size: 80×700) |
| Anode | | Mass | 0.70 g Ca | 3.3 g Ca |
| Current collector | Fe foam (porosity 95%)  (1.0 cm D, 1.5 cm H) | 300-series SS mesh stack (6 layers of 2.7 cm H × 7.3 cm W, 35×35 mesh) |
| Electrolyte | Mass | 120 g | 602 g |
| Interelectrode distance | 0.5 cm | 1.3 cm |
| Crucible | Material | 300-series SS | 300-series SS |
| Dimensions | 6.8 cm D | 9.5 cm L × 9.5 cm W × 6.0 cm H |

**Table S3**. Estimation of electrode cost based on the performance of the Ca | CaCl2-LiCl | Sb(s) battery presented in **Figure 3**.

|  | Ca | Sb | Total |
| --- | --- | --- | --- |
| mass, *m* / g | 0.7 | 0.7 | 1.4 |
| Commodity bulk price, *P* / $/kg | 4.0 | 9.7 |  |
| Average discharge capacity, *Q* / mAh | 500 |  |  |
| Average discharge energy, *ED* / kWh | 0.62E-03 |  |  |
| Electrode cost, *C* / $/kWh | 15.5 |  |  |
| Energy density / Wh/kg | 620 |  |  |

**Table S4**. Specific capacity per mass of cathode used and calculated electrode cost for the Ca||Sb(s) cell (**Figure 3**), compared to previously reported liquid metal batteries.

| Electrode  couple | Operating  temperature (°C) | Specific  capacity  (mAh g-1) | Electrode  cost ($/kWh) | Reference |
| --- | --- | --- | --- | --- |
| **Ca||Sb(*s*)** | **520** | **715** | **15.5** | **This work** |
| Ca||Sb(*l*) | 700 | 136 | 90 | doi 10.1149/2.0801412jes |
| Ca-Mg||Bi(*l*) | 550 | 90 | 144 | doi: 10.1038/ncomms10999 |
| Li||Sb-Pb(*l*) | 450 | 121 | 68 | doi:10.1038/nature13700 |
| 500 | 171 | 65 |
| Li||Bi(*l*) | 550 | 293 | 169 | doi.org/10.1016/j.jpowsour.2014.10.173 |
| Li||Sb-Sn(*l*) | 500 | 259 | 73 | doi.org/10.1021/acsami.6b02576 |
| Li||Te-Sn(*l*) | 500 | 368 | 143 | doi.org/10.1016/j.ensm.2018.04.017 |
| Mg||Sb(*l*) | 700 | 147 | 276 | doi.org/10.1021/ja209759s |
